# Supplementary material for: The Mycotoxin Patulin Inhibits the Mitochondrial Carnitine/Acylcarnitine Carrier (SLC25A20) by Interaction with Cys136 Implications for Human Health
Source: MDPI journal article supplement (doi:10.3390/ijms24032228), 2023-01-23
Supplement: s1 [file s1]

# **The mycotoxin patulin inhibits the mitochondrial carnitine/acylcarnitine carrier (SLC25A20) by interaction with Cys136. Implications for human health**

**Nicola Giangregorio<sup>1,†,\*</sup>, Annamaria Tonazzi<sup>1,†</sup>, Cosima Damiana Calvano<sup>2</sup>, Ciro Leonardo Pierri<sup>3</sup>, Giovanna Incampo<sup>4</sup>, Tommaso R.I. Cataldi<sup>2</sup> and Cesare Indiveri<sup>1,5</sup>**

<sup>1</sup> CNR Institute of Biomembranes, Bioenergetics and Molecular Biotechnologies (IBIOM), Via Amendola 122/O, 70126 Bari, Italy

<sup>2</sup> Department of Chemistry, University of Bari Aldo Moro, via Orabona 4, 70126, Bari, Italy

<sup>3</sup> Department of Pharmacy-Pharmaceutical Sciences, University of Bari Aldo Moro, via Orabona 4, 70126, Bari, Italy

<sup>4</sup> Department of Bioscience, Biotechnology and Environment, University of Bari, Italy

<sup>5</sup> Department DiBEST (Biologia, Ecologia, Scienze della Terra) Unit of Biochemistry and Molecular Biotechnology, University of Calabria, Via Bucci 4C, 87036 Arcavacata di Rende, Italy

† These authors contributed equally to this work.

\* Correspondence: n.giangregorio@ibiom.cnr.it

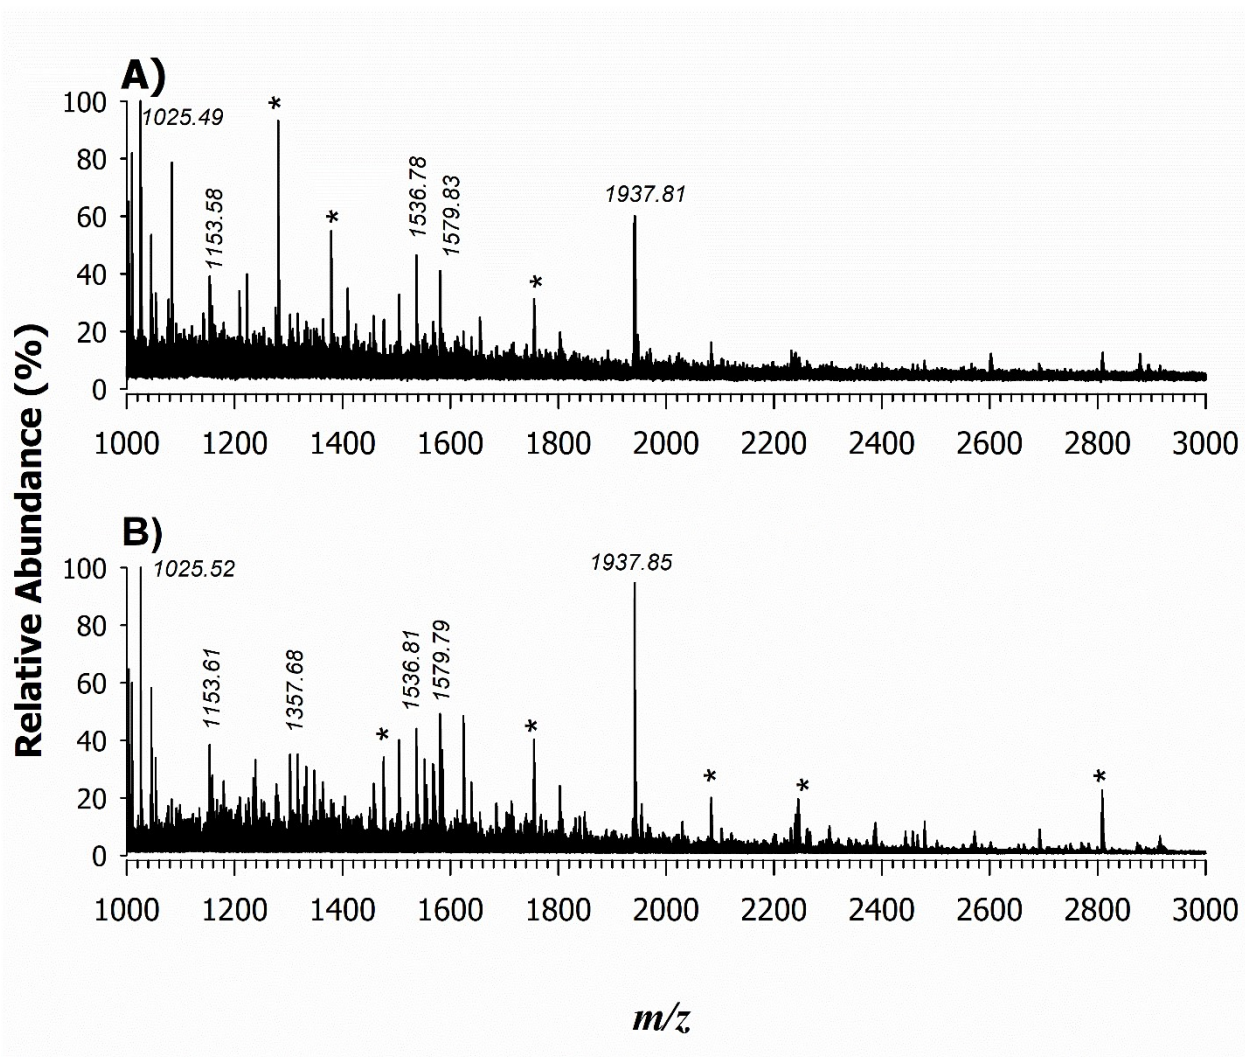

**Figure S1.** PMF of in-gel digestion of the 30 kDa bands excised from control (A) and (B) PAT-treated samples. Table 1 lists all main peak signals and their amino acid sequence. Asterisked peaks are most likely due to co-extracted CAC and digested proteins

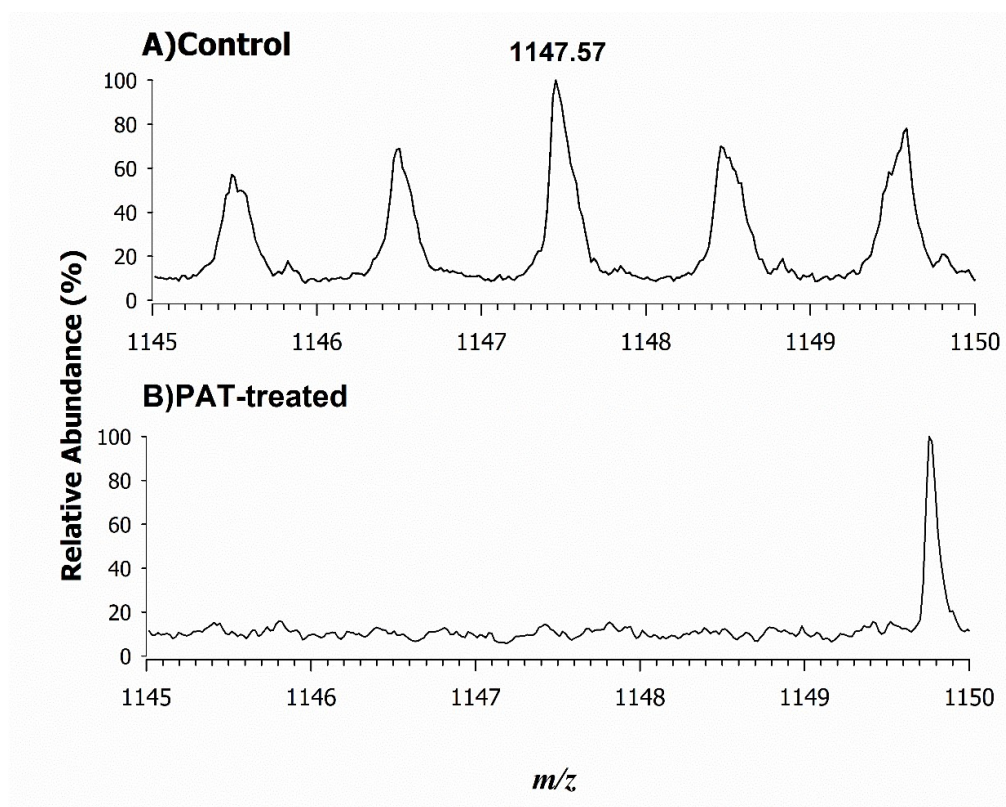

**Figure S2.** A zoom on the peak assigned as peptide CLLQIQASSGK, at  $m/z$  1147.57, is shown for control (A) and PAT-treated (B) samples.

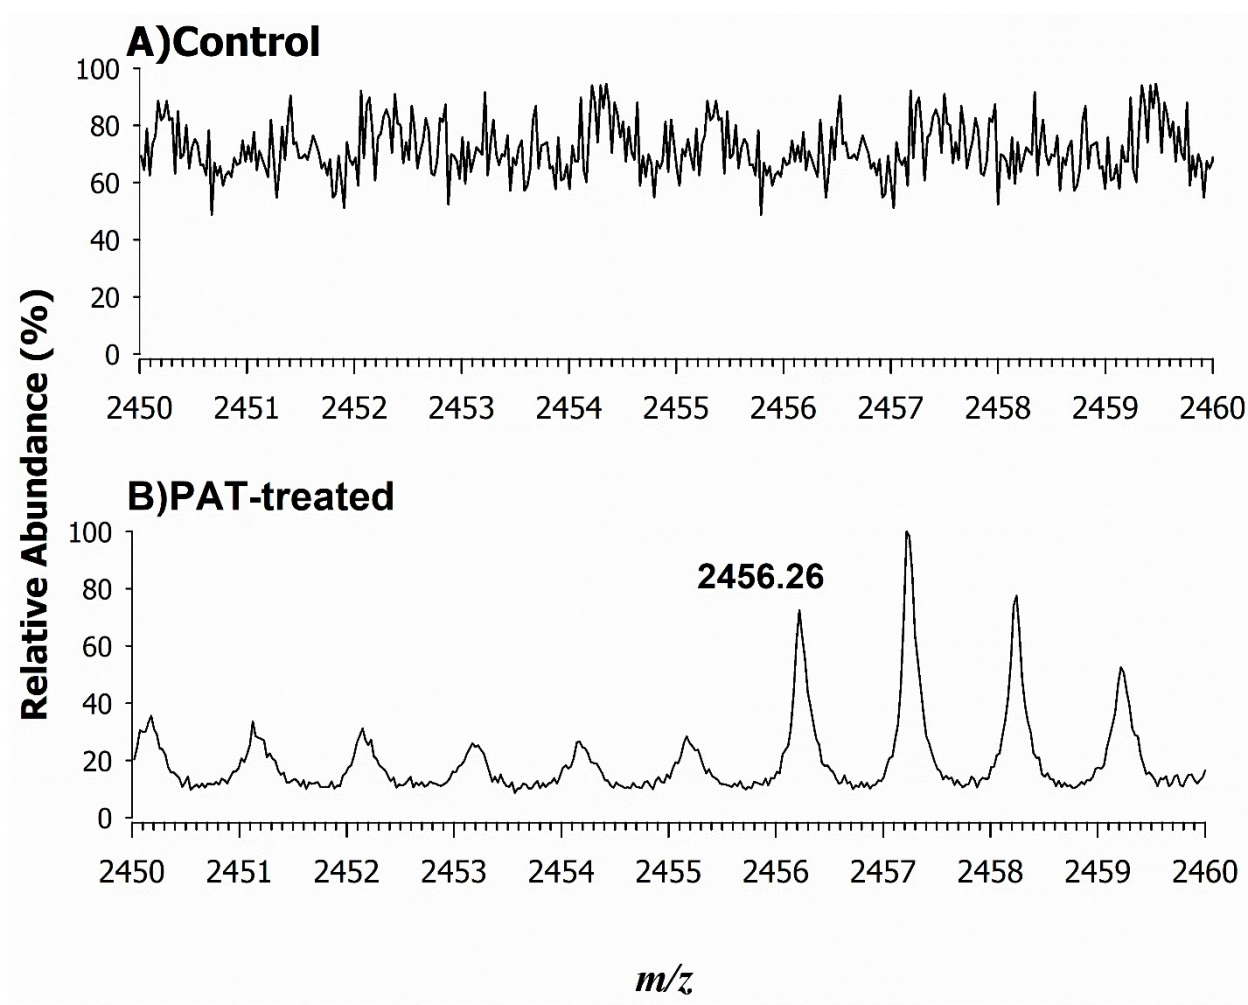

**Figure S3.** A zoom on the peak assigned as peptide CLLQIQASSGKNKYSGTLDCAKK, at  $m/z$  2456.3, is shown for control (A) and PAT-treated (B) samples.

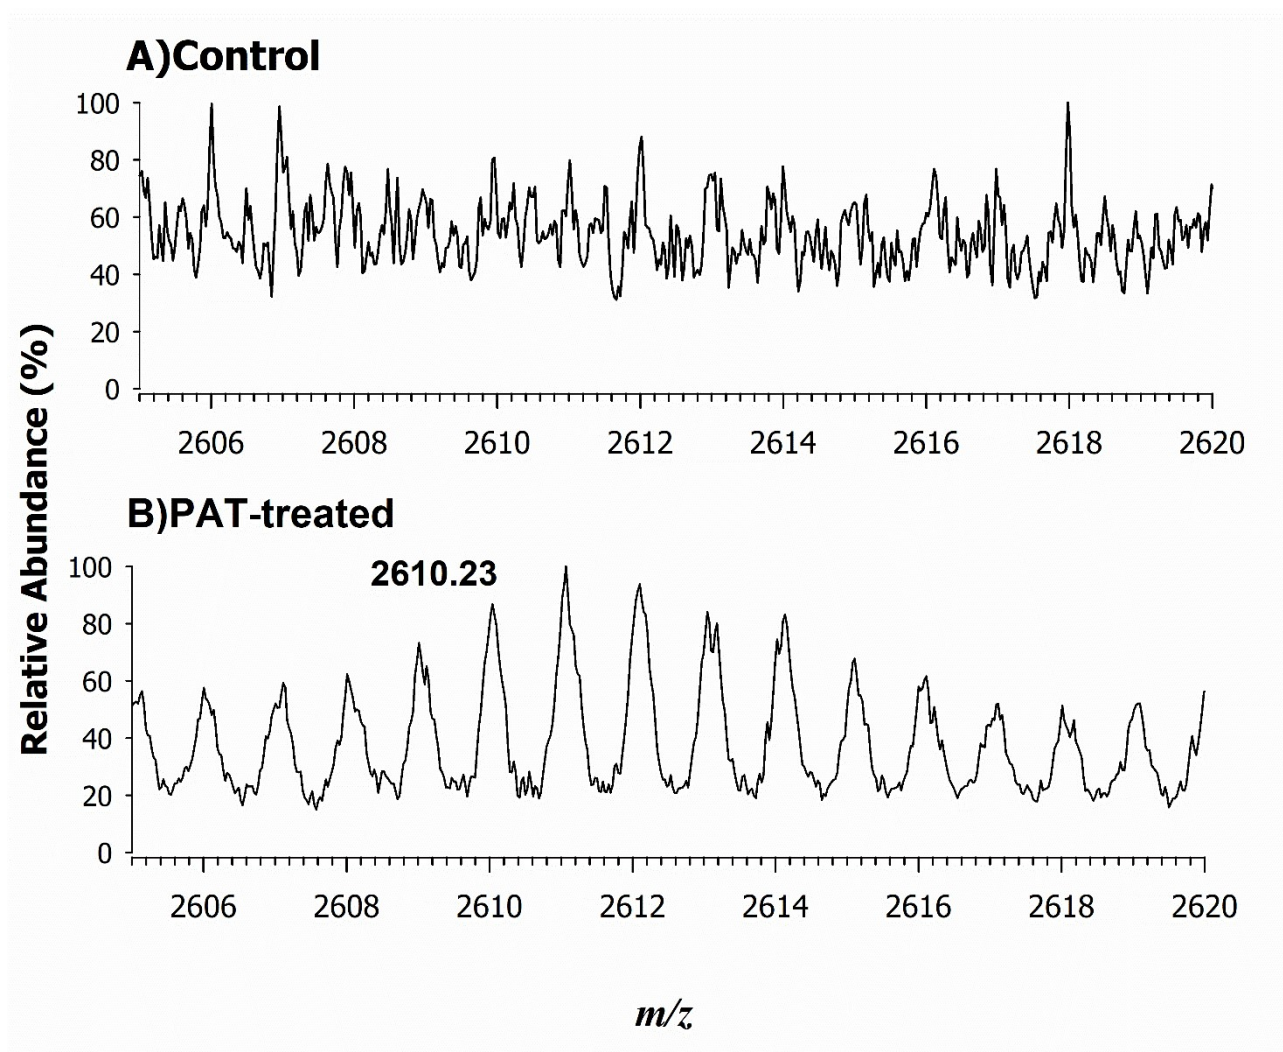

**Figure S4.** A zoom on the peak associated with modified peptide, at  $m/z$  2610.23, is shown for control (A) and PAT-treated (B) samples.
